# Supplementary material
Source: PubMed Central journal article supplement (PMC4342691)

| Protein                | $K_D$ (M)             | $K_{on}$ ( $M^{-1} s^{-1}$ ) | $K_{off}$ ( $s^{-1}$ ) |
|------------------------|-----------------------|------------------------------|------------------------|
| B2FΔTM                 | $2.7 \times 10^{-10}$ | $1.3 \times 10^6$            | $3.6 \times 10^{-4}$   |
| B2FΔTM-V397G           | $4.1 \times 10^{-9}$  | $7 \times 10^5$              | $2.9 \times 10^{-3}$   |
| B2FΔTM-Q434H           | $4.8 \times 10^{-10}$ | $5.5 \times 10^5$            | $2.6 \times 10^{-4}$   |
| B2FΔTM-<br>V397G/Q434H | $1.9 \times 10^{-9}$  | $1.2 \times 10^6$            | $2.2 \times 10^{-3}$   |

**Supplemental Table 1.** Affinity kinetics of 54G10 to HMPV F protein mutants.

**Supplemental Figure 1.** Association and dissociation curves of mAbs to the HMPV F protein. (A) 54G10 binds to HMPV F with a  $K_D$  in the sub-nanomolar range. (B) Palivizumab does not bind to HMPV F.

**Supplemental Figure 2.** Delayed HMPV infection after 54G10 prophylaxis. Nasal turbinates (A) and lungs (B) have a significant decrease in virus titer when infected one week after 54G10 prophylaxis,  $***p < 0.001$ . Virus titer was  $\log_{10}$  transformed and analyzed by Student's t-test with 3 mice per group.

**A**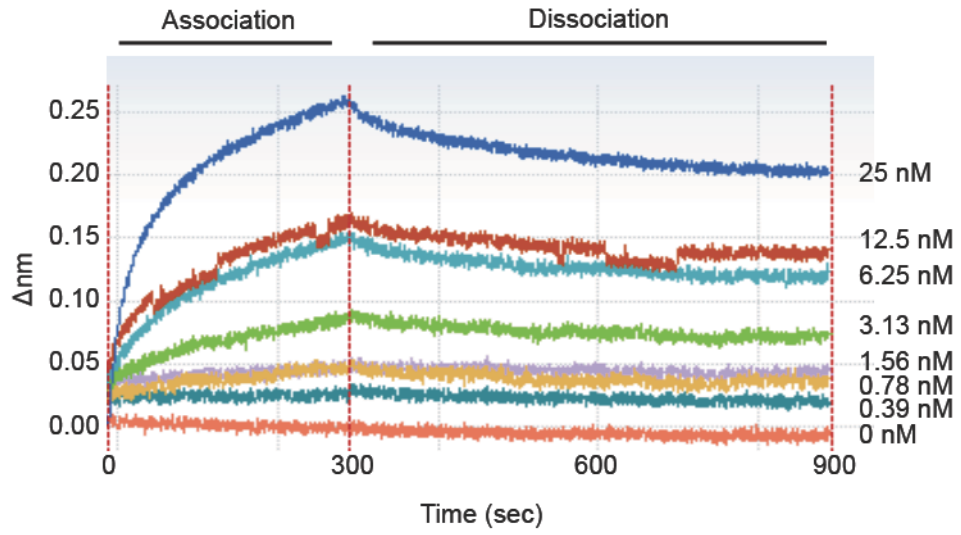**B**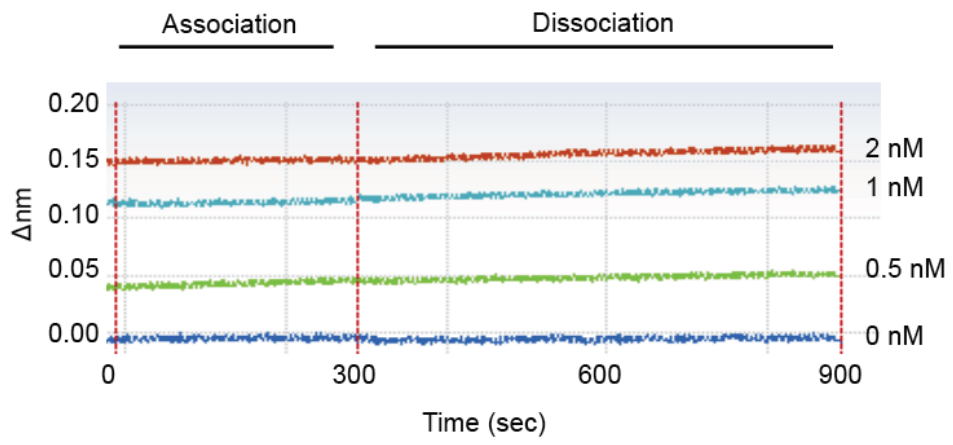

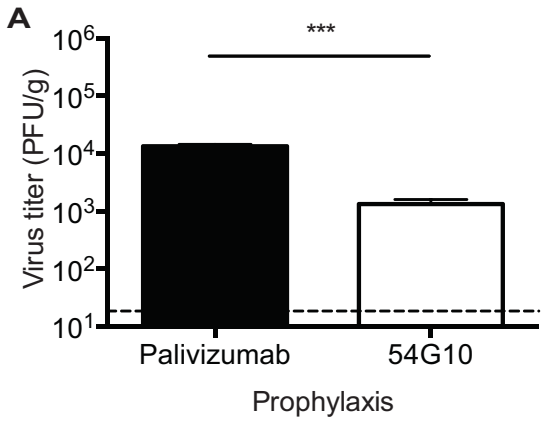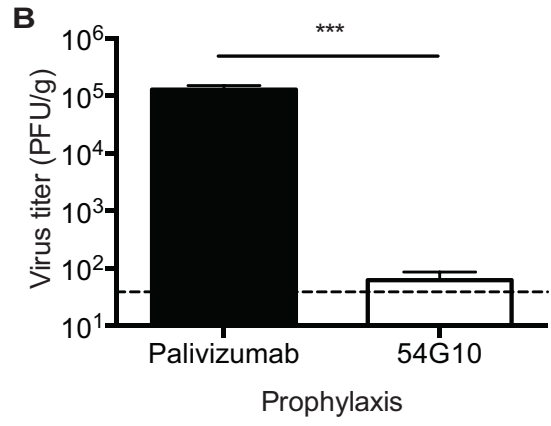

Supplement: supp_jiu307_jiu307supp.pdf [file supp_jiu307_jiu307supp.pdf]
